# Supplementary material for: Anti-PD1 does not improve pyroptosis induced by γδ T cells but promotes tumor regression in a pleural mesothelioma mouse model
Source: PubMed Central journal article supplement (PMC10701743; doi:10.3389/fimmu.2023.1282710), 2023-11-23
Supplement: DataSheet_1.pdf [file DataSheet_1.pdf]

**Suppl. Fig. 1**

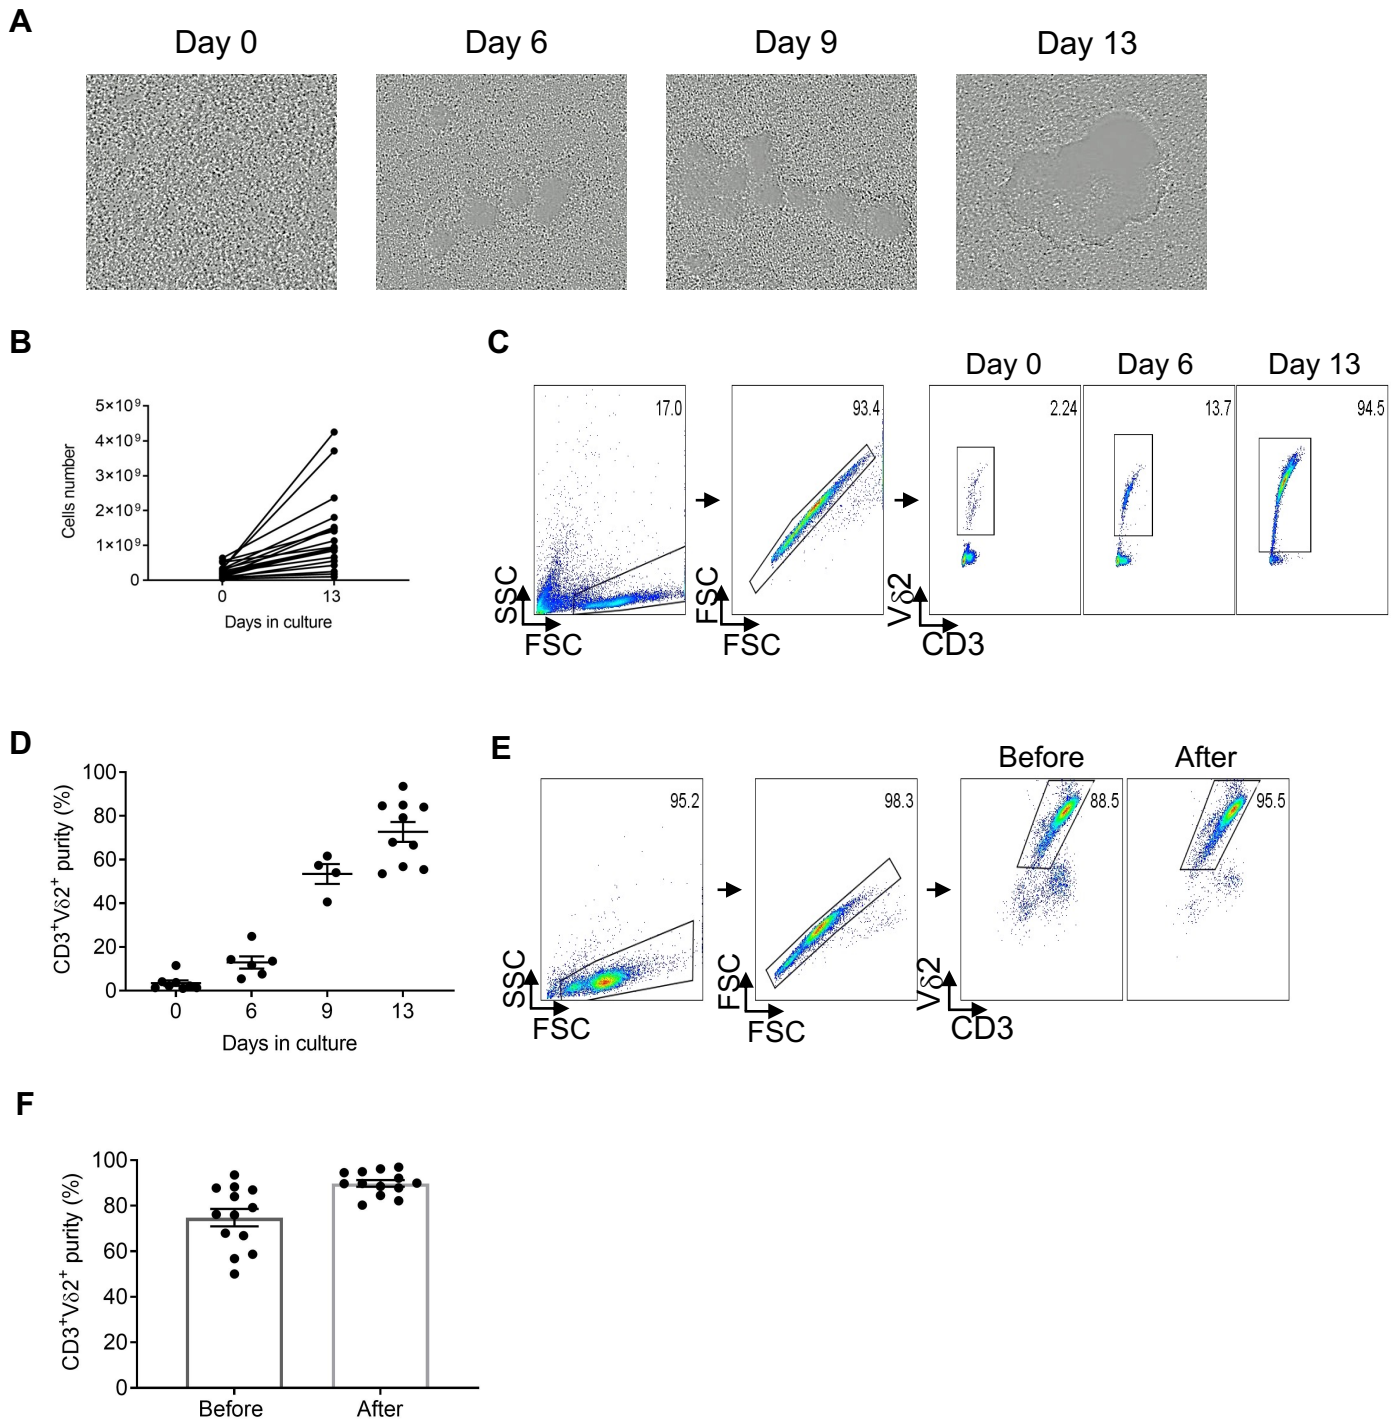

**Suppl. Fig. 1. Expansion of Vδ2 T cells in vitro.** (A) Detection of cell clusters observed under 40X bright field microscopy over time. (B) The number of CD3<sup>+</sup>Vδ2<sup>+</sup> cells increase ~100-fold after 13 days of culture (n=22). (C, D) Flow cytometry analysis of the purity of CD3<sup>+</sup>Vδ2<sup>+</sup> cells increased over time in the expansion culture. Representative dot plots and a column graph are shown (n≥4). (E, F) Dot plots shown for the purity of CD3<sup>+</sup>Vδ2<sup>+</sup> cells achieved to >95% after microbeads isolation presented as column graph (n=13).

## Suppl. Fig. 2

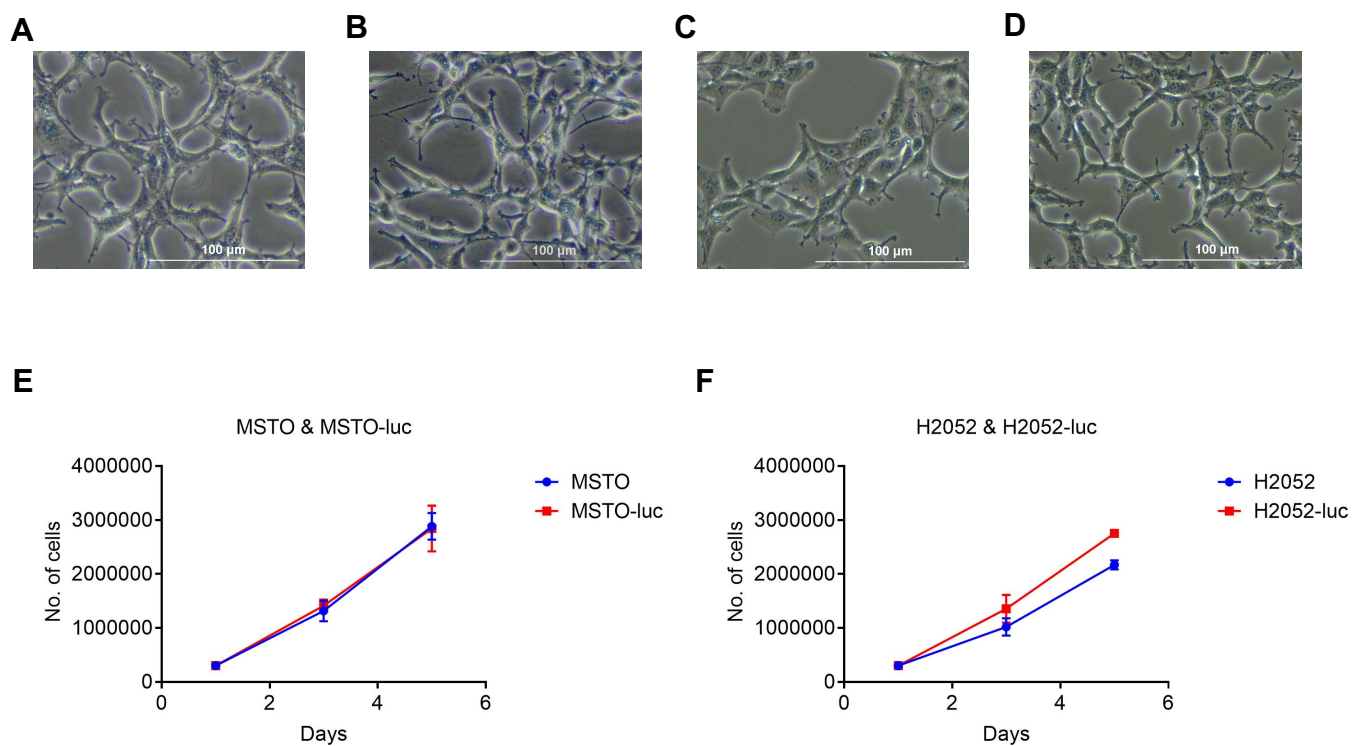

**Suppl. Fig. 2. Cell growth rate of mesothelioma and transduced luciferase reporter cell lines.** Morphology of (A) MSTO, (B) H2052, (C) MSTO-luc and (D) H2052-luc cell lines under bright field microscope at 100X magnification. Number of cells over time of (E) MSTO and MSTO-luc, and (F) H2052 and H2052-luc shown as line graphs.

### Suppl. Fig. 3

**A**

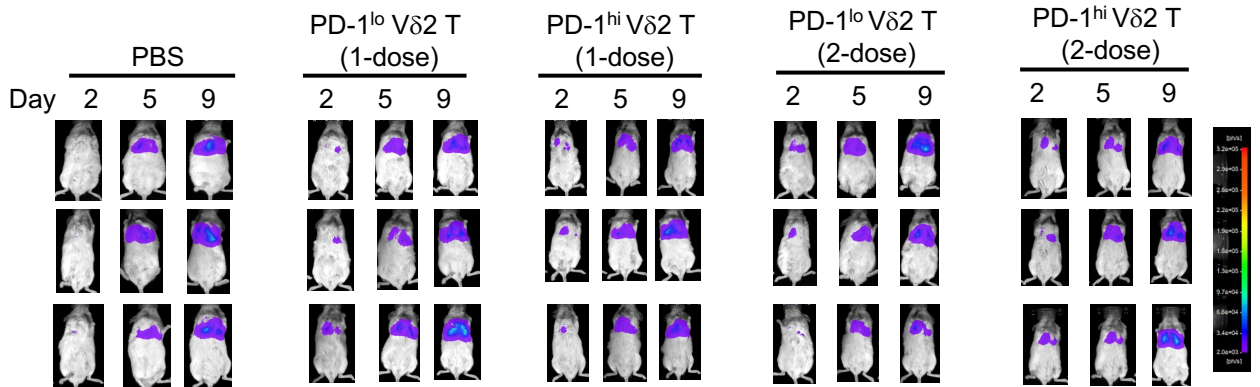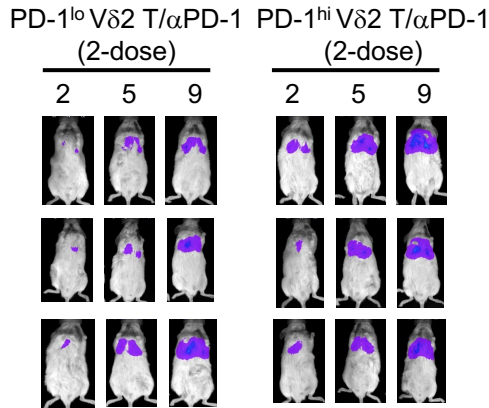

**B**

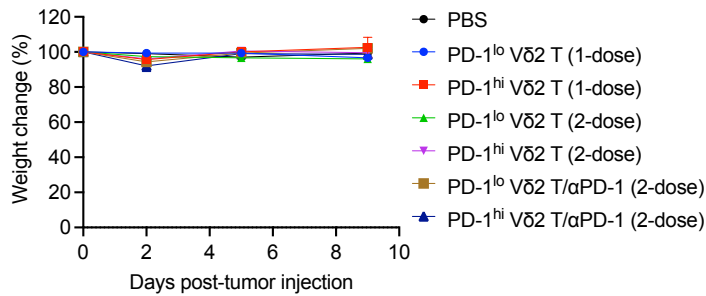

**C**

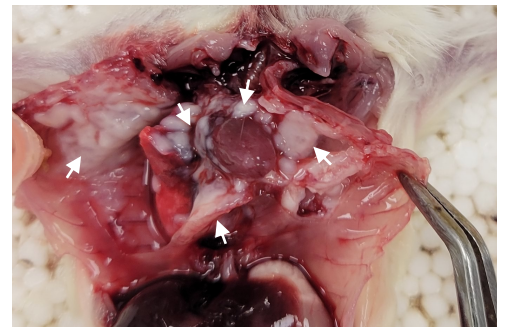

**Suppl. Fig. 3. MSTO-luc mice experiments. (A)** Detection of luciferase activities of MSTO-luc mice from each treatment group over the course of experiment. Three mice per group is shown. **(B)** Weight change of MSTO-luc mice groups. **(C)** Spread of MSTO-luc tumor at experimental endpoint in the pleural cavity, with white arrows indicating the tumor mass on the mesothelium, pleural and pericardial lining.

# Suppl. Fig. 4

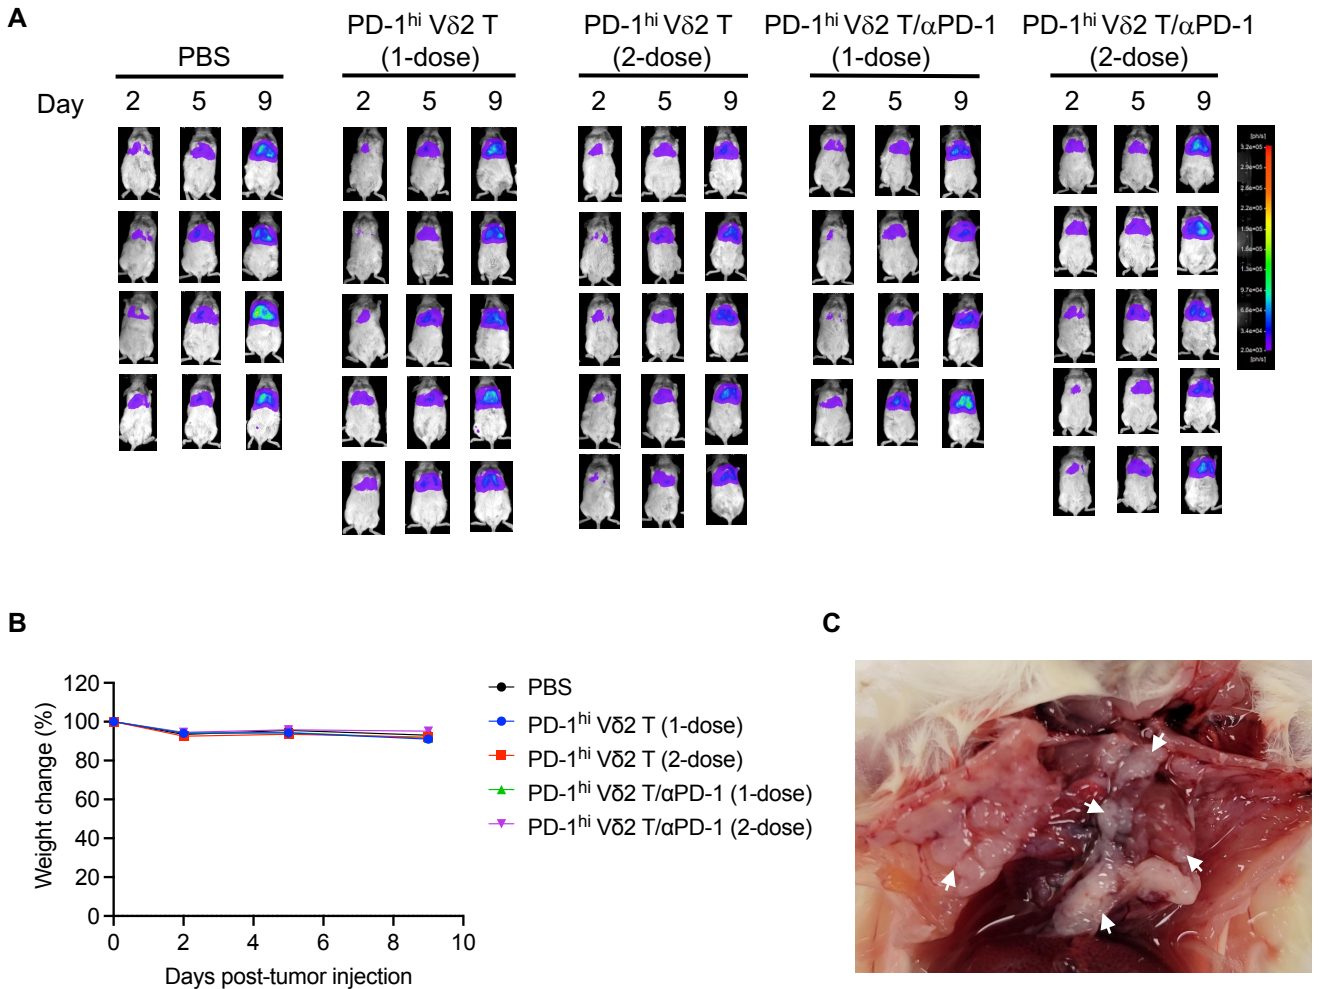

**Suppl. Fig. 4. H2052-luc mice experiments.** (A) Detection of luciferase activities of H2052-luc mice from each treatment group over the course of experiment. Four to five mice per group is shown. (B) Weight change of H2052-luc mice groups. (C) Spread of H2052-luc tumor at experimental endpoint in the pleural cavity, with white arrows indicating the tumor mass on the mesothelium, pleural and pericardial lining.



**A** Suppl. Fig. 5

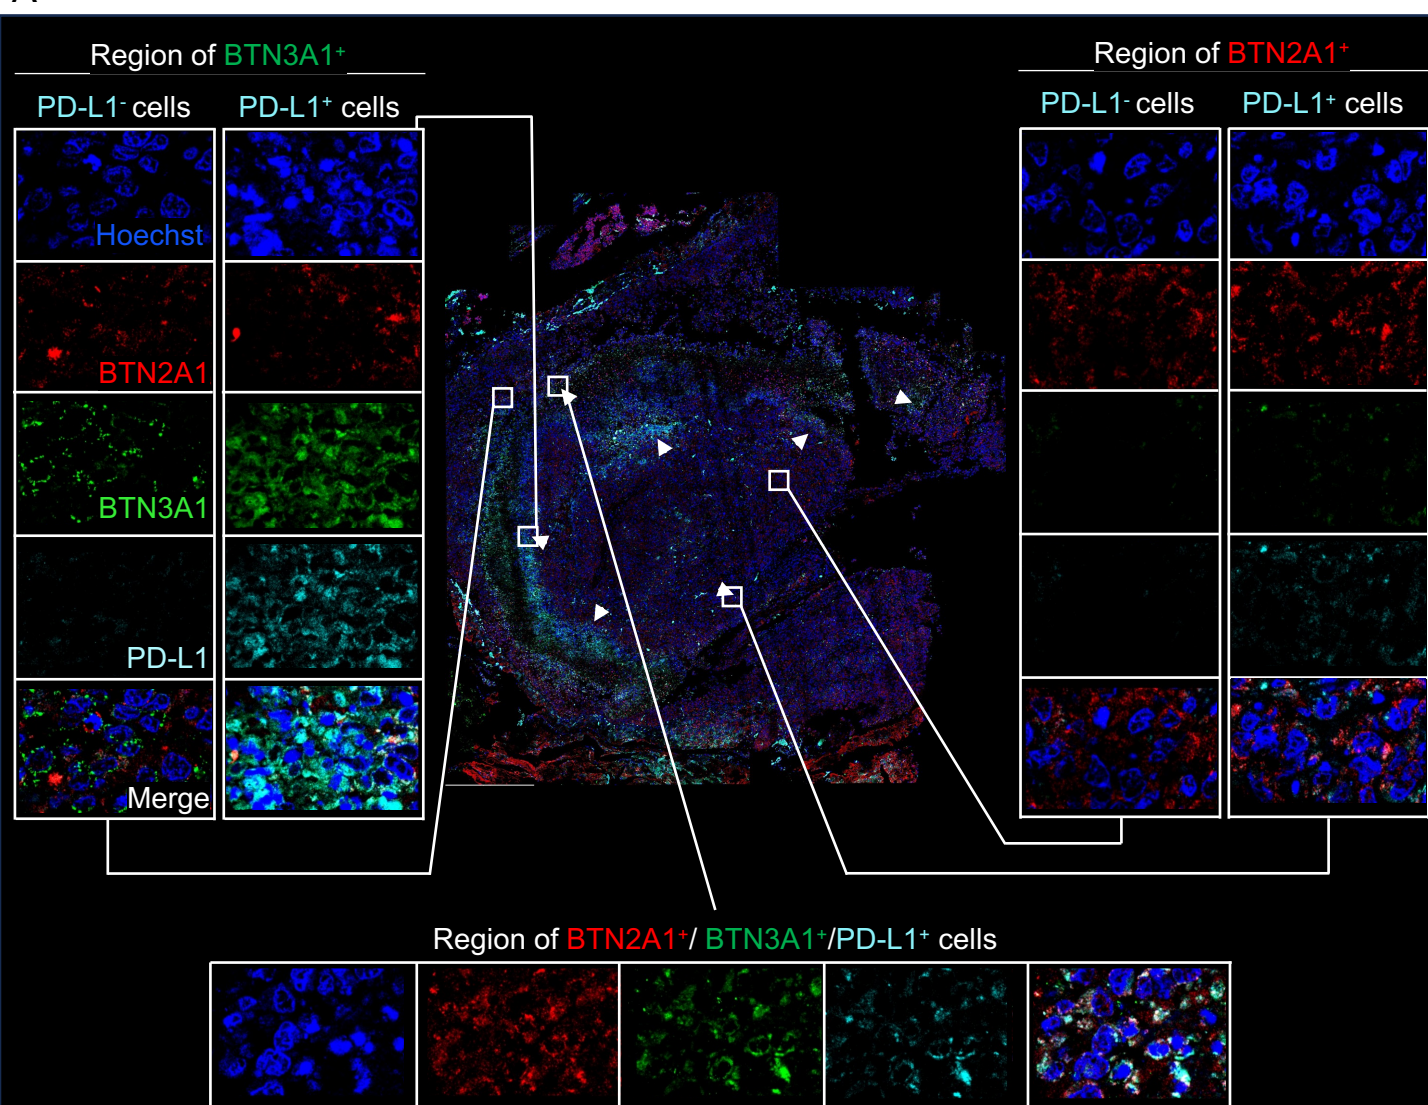

**B**

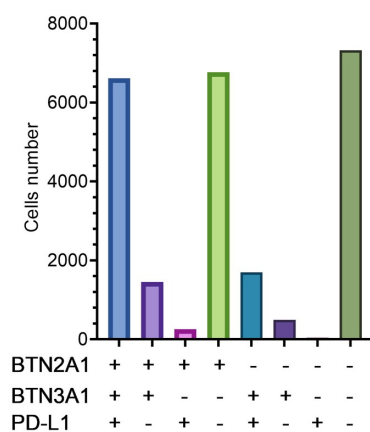

**Suppl. Fig. 5. Analysis of BTN2A1, BTN3A1 and PD-L1 expressing cells in mesothelioma tumor. (A)** H2052-luc tumor tissue sections from V $\delta$ 2 T (2-dose) mice were immunostained for BTN3A1 (green), BTN2A1 (red), PD-L1 (cyan) and nucleus (blue) with Hoechst 33258. Scale bar represents 500  $\mu$ m. Representative tile scan images are shown. Insets are expanded views of the rectangular regions showing cells that are BTN2A1<sup>+</sup>/PD-L1<sup>-</sup>, BTN2A1<sup>+</sup>/PD-L1<sup>+</sup>, BTN3A1<sup>+</sup>/PD-L1<sup>-</sup>, BTN3A1<sup>+</sup>/PD-L1<sup>+</sup>, and BTN2A1<sup>+</sup>/BTN3A1<sup>+</sup>/PD-L1<sup>+</sup>. Arrows indicate regions of PD-L1 expression. **(B)** Cell counts of different combinations of single, dual or triple positive cells in the tile scan are shown.

**Suppl. Fig. 6**

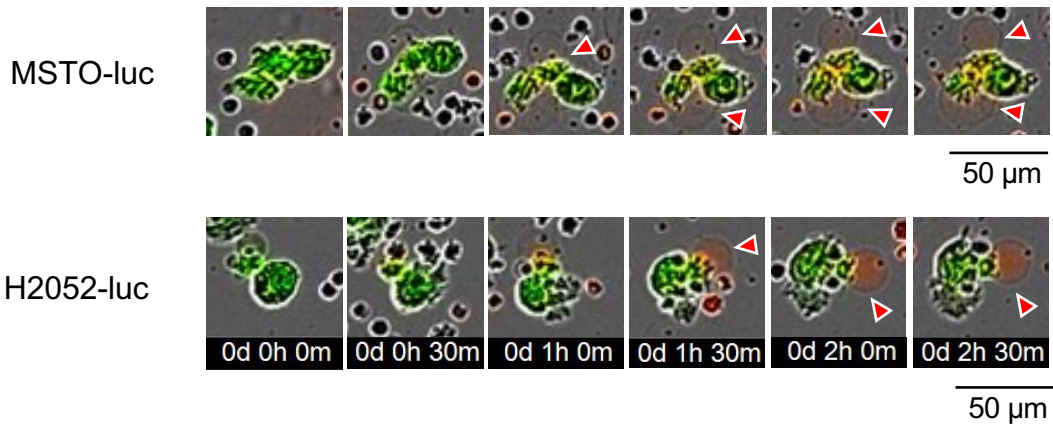

**Suppl. Fig. 6. Membrane swelling of mesothelioma cells induced by co-culture of V $\delta$ 2 T cells at 10:1 E:T ratio.** MSTO-luc and H2052-luc cells were pre-stained with green fluorescent Calcein dye. Cytotox Red reagent were used in the media, accumulation of red fluorescence indicates cell membrane integrity disruption (cell death). Arrows point to the membrane swelling or “ballooning” of the cells, a characteristic of pyroptosis.

# Suppl. Fig. 7

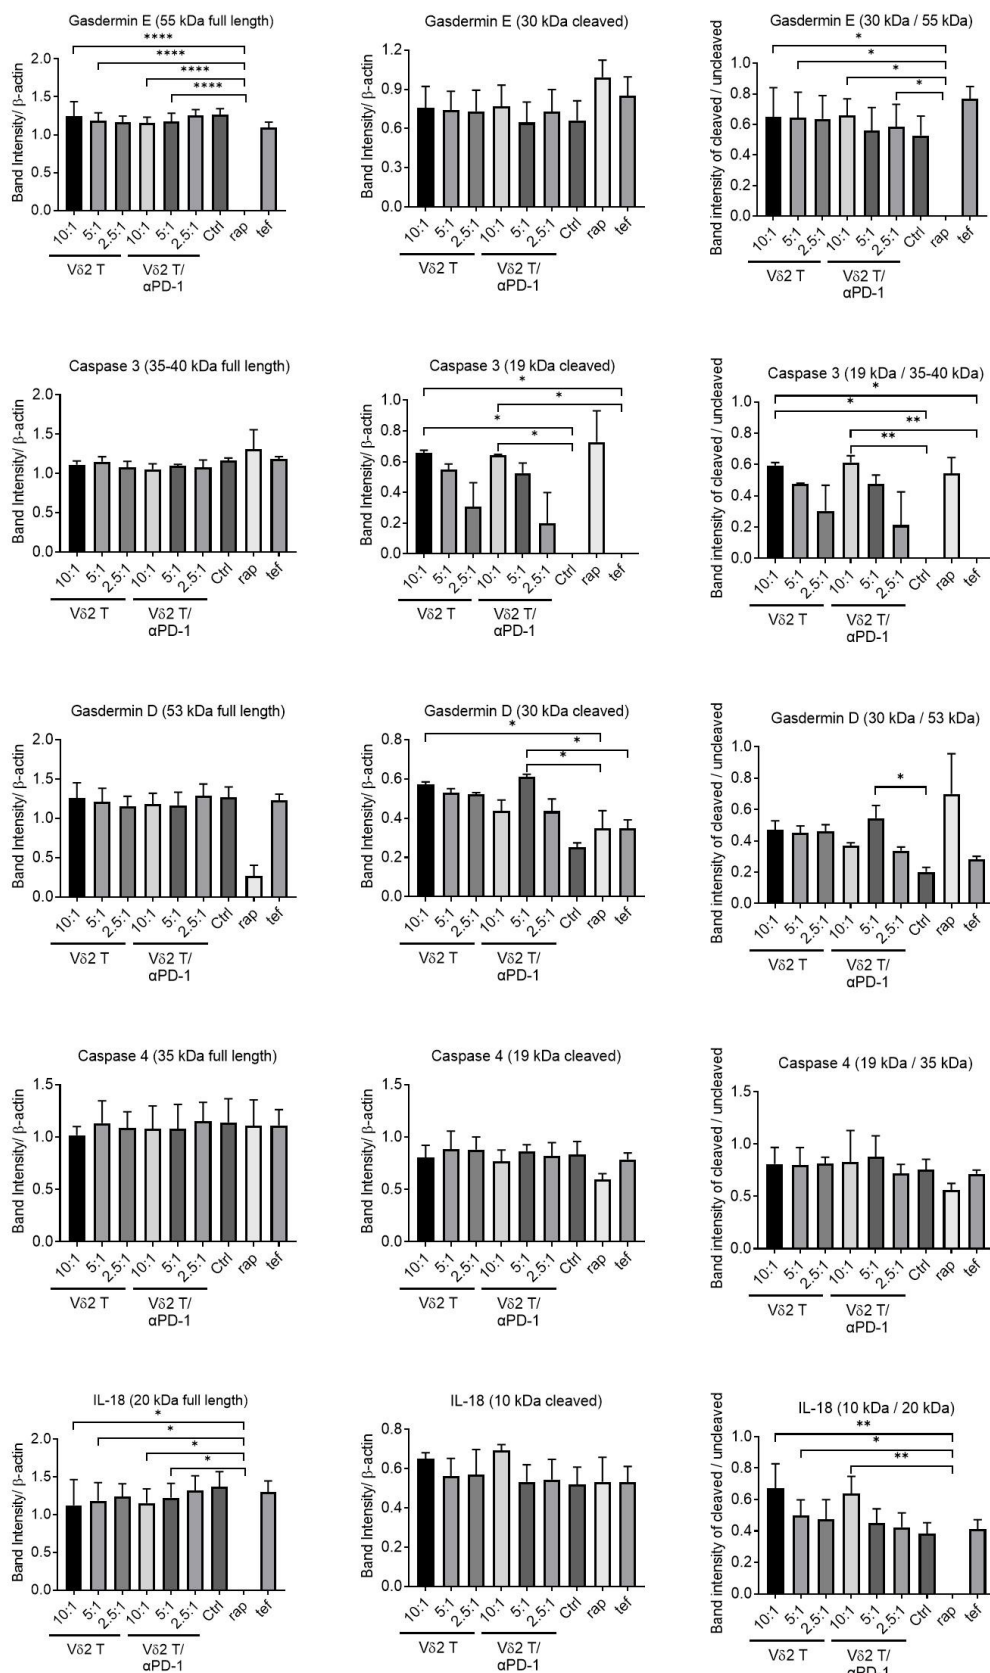

**Suppl. Fig. 7. Densitometry analysis of pyroptosis related proteins from Western blotting bands.** Band intensities normalized to  $\beta$ -actin from Figure 4 and two other independent experiments are shown as mean  $\pm$  SEM in the column graphs. Ratio of cleaved and full-length forms of GasD, GasE, Caspase-3 and Caspase-4 are shown. One-way ANOVA statistical test was used. \* $P < 0.05$ , \*\* $P < 0.01$ , \*\*\* $P < 0.001$ .

A

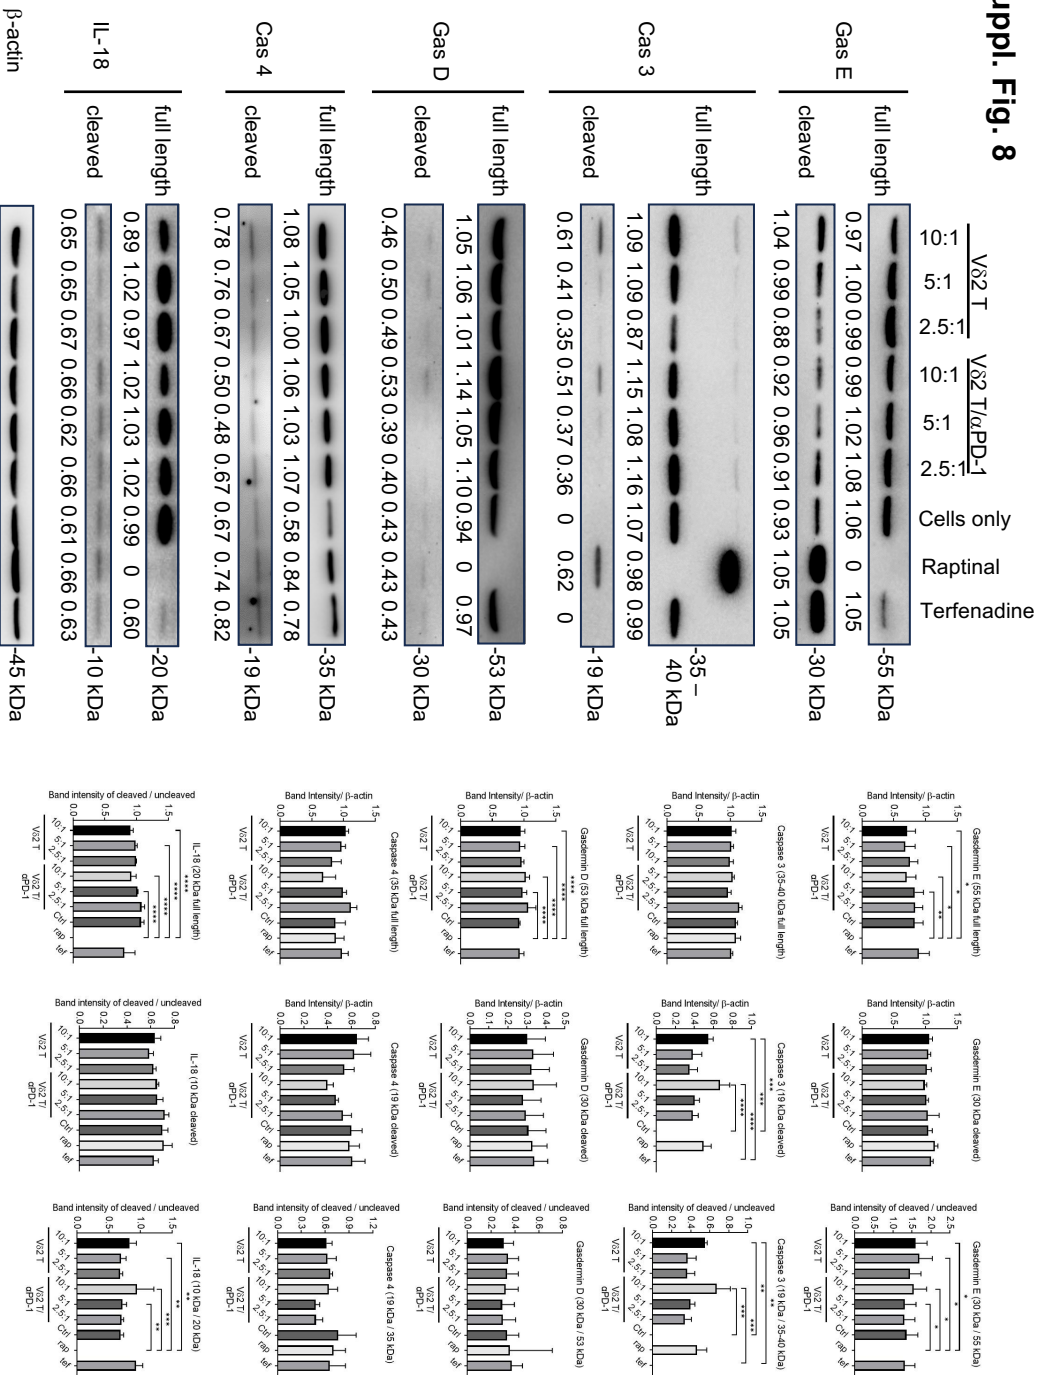

B

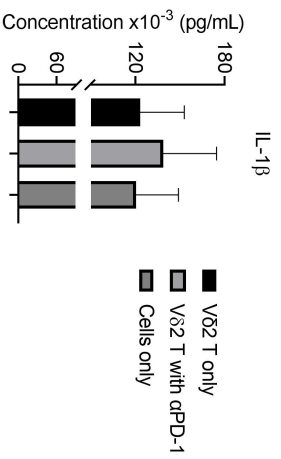

**Suppl. Fig. 8. V $\delta$ 2 T cells elicit the expression of caspase 3, caspase 4, GasD, GasE and IL-18 in H2052-luc.** (A) Analysis of protein expression level of GasE, caspase 3, and IL-18 in H2052-luc. (A) Analysis of protein expression level of GasE, caspase 3, and IL-18 in H2052-luc, following 6 h of co-culture between V $\delta$ 2 T cells and H2052-luc. Arrows indicate expected band size of the full-length or cleaved proteins. Numbers under the bands represent band intensity normalized to  $\beta$ -actin. Representative immunoblots are shown. (C) ELISA analysis of IL-1 $\beta$  in H2052-luc in 10:1 effector to target ratio. Data represents mean  $\pm$  SEM from three independent experiments. One-way ANOVA statistical test was used. \* $P < 0.05$ , \*\* $P < 0.01$ , \*\*\* $P < 0.001$ .

Suppl. Fig. 9

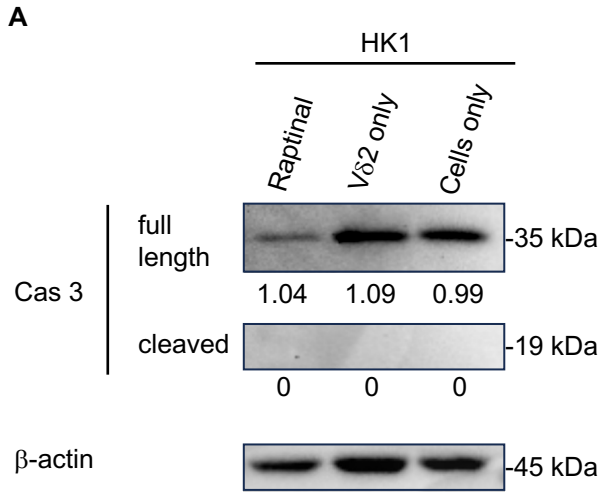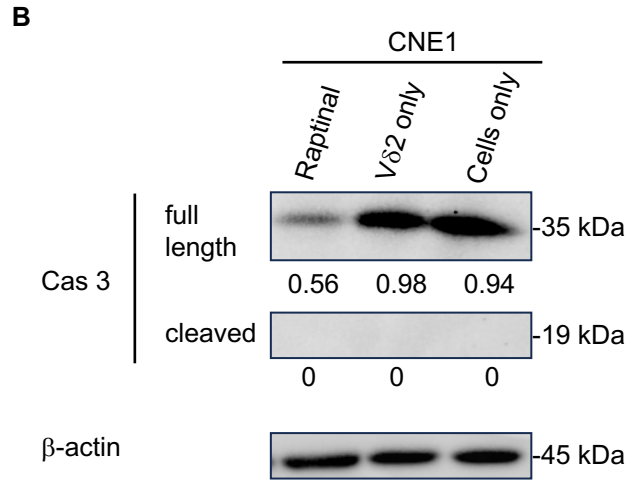

**Suppl. Fig. 9. Expression of caspase 3 in HK1 and CNE1 following co-culture with Vδ2 T cells.** Analysis of band intensities of Western blot compared to β-actin (shown as numbers) in **(A)** HK1, and **(B)** CNE1. Representative immunoblots are shown.



**Suppl. Table 1. Antibodies used in this study.**

| <b>Experiment</b>                               | <b>Antibody name</b>                  | <b>Host</b> | <b>Catalog no.</b> | <b>Source</b>  |
|-------------------------------------------------|---------------------------------------|-------------|--------------------|----------------|
| Western blot                                    | anti- $\beta$ actin                   | rabbit      | 4970               | Cell signaling |
|                                                 | anti-Caspase 3                        | rabbit      | 9662               | Cell Signaling |
|                                                 | anti-Caspase 4                        | rabbit      | ab22687            | Abcam          |
|                                                 | anti-Gasdermin E                      | rabbit      | 19453              | Cell Signaling |
|                                                 | anti-Gasdermin D                      | rabbit      | 97558              | Cell Signaling |
|                                                 | anti-IL-18                            | rabbit      | 67775S             | Cell Signaling |
| Flow cytometry                                  | anti-rabbit                           | donkey      | AP182P             | Merck          |
|                                                 | PE anti-BTN2A1                        | rabbit      | orb494685          | Biorbyt        |
|                                                 | FITC anti-BTN3A1                      | rabbit      | abx303219          | Abbexa         |
|                                                 | APC anti-human CD274 (PD-L1)          | mouse       | 563741             | BD Pharmingen  |
|                                                 | BV421 anti-human CD273 (PD-L2)        | mouse       | 563842             | BD Horizon     |
|                                                 | Alexa Fluor 700 anti-human CD95 (Fas) | mouse       | 305648             | Biolegend      |
|                                                 | PE anti-human V $\delta$ 2 TCR        | mouse       | 555739             | BD Pharmingen  |
|                                                 | Pacific Blue anti-human CD3           | mouse       | 558117             | BD Pharmingen  |
|                                                 | APC anti-human CD279 (PD-1)           | mouse       | 558694             | BD Pharmingen  |
|                                                 | Immunohistochemistry                  | anti-BTN3A1 | mouse              | ABIN5684130    |
| anti-BTN2A1                                     |                                       | rabbit      | orb499606          | Biorbyt        |
| TCR V delta 2 monoclonal antibody (15D)         |                                       | mouse       | TCR1732            | Invitrogen     |
| CD274 (PD-L1, B7-H1) monoclonal antibody (MIH5) |                                       | rat         | 14-5982-82         | Invitrogen     |
| Cleaved gasdermin D                             |                                       | rabbit      | 36425S             | Cell Signaling |
| Alexa Fluor 488 anti-mouse                      |                                       | goat        | A-11005            | Invitrogen     |
| Alexa Fluor Plus 647 anti-rabbit                |                                       | goat        | A32733             | Invitrogen     |
| Alexa Fluor 594 anti-rat                        |                                       | goat        | A-11007            | Invitrogen     |
|                                                 | Hoechst 33258                         |             | ab228550           | Abcam          |
